# Supplementary material for: Phytochemical profiling of Euphorbia tirucalli Linn. latex and evaluation of its in vitro antibacterial activity against resistant Klebsiella pneumoniae: an integrative network pharmacology and molecular dynamics simulation study
Source: Royal Society of Chemistry journal article supplement (doi:10.1039/d6ra00720a), 2026-03-31
Supplement: d6ra00720a1.pdf [file d6ra00720a1.pdf]

## Supplementary Information

### Phytochemical Profiling of *Euphorbia tirucalli* Linn. Latex and Evaluation of its *In Vitro* Antibacterial Activity against Resistant *Klebsiella pneumoniae*: An Integrative Network Pharmacology and Molecular Dynamics Simulation Study

Fathy A. Behery<sup>1,2,§</sup>, Abeer H. Elmaidomy<sup>3,§</sup>, Rehab Mahmoud Abd El-Baky<sup>4,5</sup>, Mohamed A. Mawhoup<sup>5</sup>, Ruqaiyah I. Bedaiwi<sup>6</sup>, Hesham A. Abou-Zied<sup>7</sup>, Mostafa E. Rateb<sup>8</sup>, Usama Ramadan Abdelmohsen<sup>9,10\*</sup>

<sup>1</sup>Department of Pharmacognosy, Faculty of Pharmacy, Mansoura University, Mansoura, Egypt. fathybehery@mans.edu.eg

<sup>2</sup>Department of Pharmacy, College of Pharmacy, Nursing and Medical Sciences, Riyadh Elm University, Riyadh, Saudi Arabia.

<sup>3</sup>Department of Pharmacognosy, Faculty of Pharmacy, Beni-Suef University, Beni-Suef 62514, Egypt. Abeer011150@pharm.bsu.edu.eg

<sup>4</sup>Department of Microbiology and Immunology, Faculty of Pharmacy, Minia University, Minia, Egypt. rehab.mahmoud@mu.edu.eg

<sup>5</sup>Department of Microbiology and Immunology, Faculty of Pharmacy, Deraya University, Minia, Egypt. mohamed.mawhoup@deraya.edu.eg

<sup>6</sup>Department of Medical Laboratory Technology, Faculty of Applied Medical Sciences, University of Tabuk, Tabuk, Saudi Arabia. rbedaiwi@ut.edu.sa

<sup>7</sup>Department of Medicinal Chemistry, Faculty of Pharmacy, Deraya University, Minia 61111, Egypt. hisham.alaa@deraya.edu.eg

<sup>8</sup>Natural and Medical Sciences Research Center, University of Nizwa, P.O. Box 33, Birkat Al Mauz, Nizwa, Oman. m.rateb@unizwa.edu.om

<sup>9</sup>Deraya Center for Scientific Research, Deraya University, New Minia, Egypt

<sup>10</sup>Department of Pharmacognosy, Faculty of Pharmacy, Minia University, Minia, Egypt

§ authors are equally contributed to this work.

\*Correspondence author: usama.ramadan@mu.edu.eg (U.R.A.).

#### Abstract

A phytochemical investigation of *Euphorbia tirucalli* Linn. (F. Euphorbiaceae) latex resulted in the isolation of five known compounds, namely euphol (1), euph-8-enol (2), gallic acid (3), methyl gallate (4), and rutin (5). The chemical structures of the isolated compounds were unambiguously established by extensive nuclear magnetic resonance (NMR) spectroscopic analysis. The antimicrobial activities of these compounds were evaluated against *Klebsiella pneumoniae* (ATCC 13883), extended-spectrum  $\beta$ -lactamase (ESBL)-producing *K. pneumoniae*, and carbapenem-resistant *K. pneumoniae* using the microbroth dilution method. Among the tested compounds, methyl gallate (4) exhibited the strongest activity against *K. pneumoniae* (ATCC 13883) with a minimum inhibitory concentration (MIC) of 0.01 mM, while euphol (1) showed the highest activity against ESBL *K. pneumoniae* (MIC = 13.12 mM). Notably, euph-8-enol (2) demonstrated the most potent inhibitory effect against carbapenem-resistant *K. pneumoniae*, with an MIC of 0.69 mM. Network analysis identified 33 host-response targets relevant to *Klebsiella* infection, enriched in pattern-recognition receptor signaling and inflammatory defense programs, particularly the Toll-like receptor and NOD-like pathways, alongside cytokine/chemokine-mediated recruitment and inflammasome-associated signaling. Molecular docking against *Klebsiella pneumoniae* LpxH (PDB: 8QK2) showed the strongest predicted affinity for euphol (1) (-8.13 kcal/mol). MD simulation of the euphol (1)-LpxH complex over 100 ns supported overall system stability, evidenced by a stable protein backbone RMSD, maintained compactness (Rg), equilibrated potential energy, and intermittent hydrogen bonding consistent with predominantly hydrophobic binding. Collectively, these findings suggested that *E. tirucalli*, with euphol as the top-ranked binder, could provide promising lead scaffolds for anti-*Klebsiella* development, warranting further *in vitro* validation of LpxH inhibition and antibacterial efficacy against resistant *Klebsiella* strains.

**Keywords:** *Euphorbia tirucalli*; Euphol; *Klebsiella pneumoniae*; LpxH; Network pharmacology; Molecular dynamics simulation.

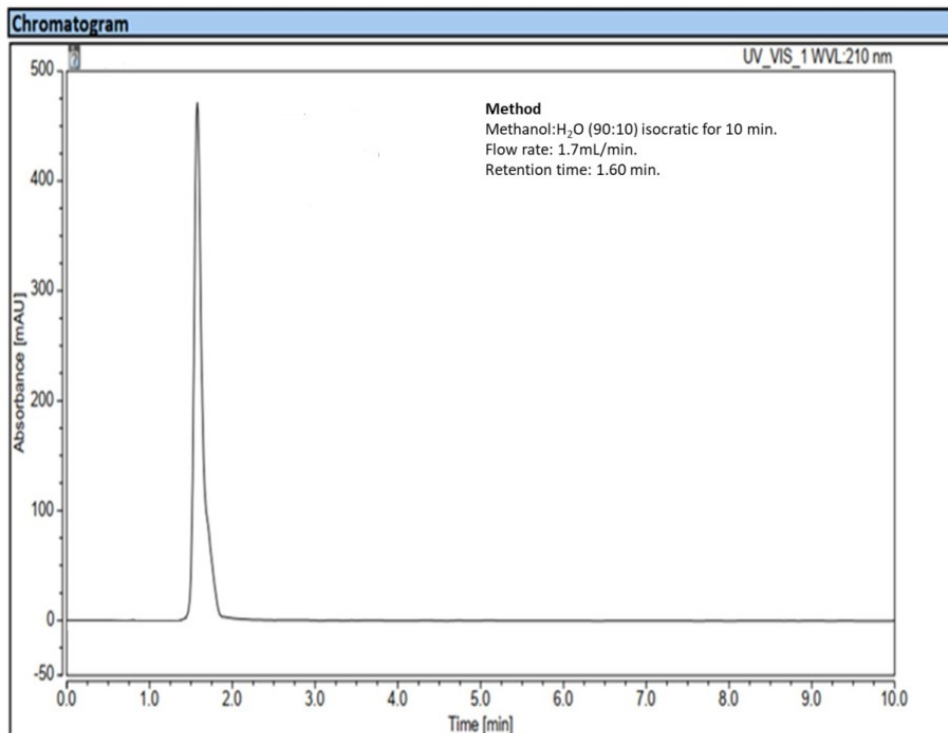

55  
56  
57  
58  
59

Figure S1. Impurity chart for compound 1

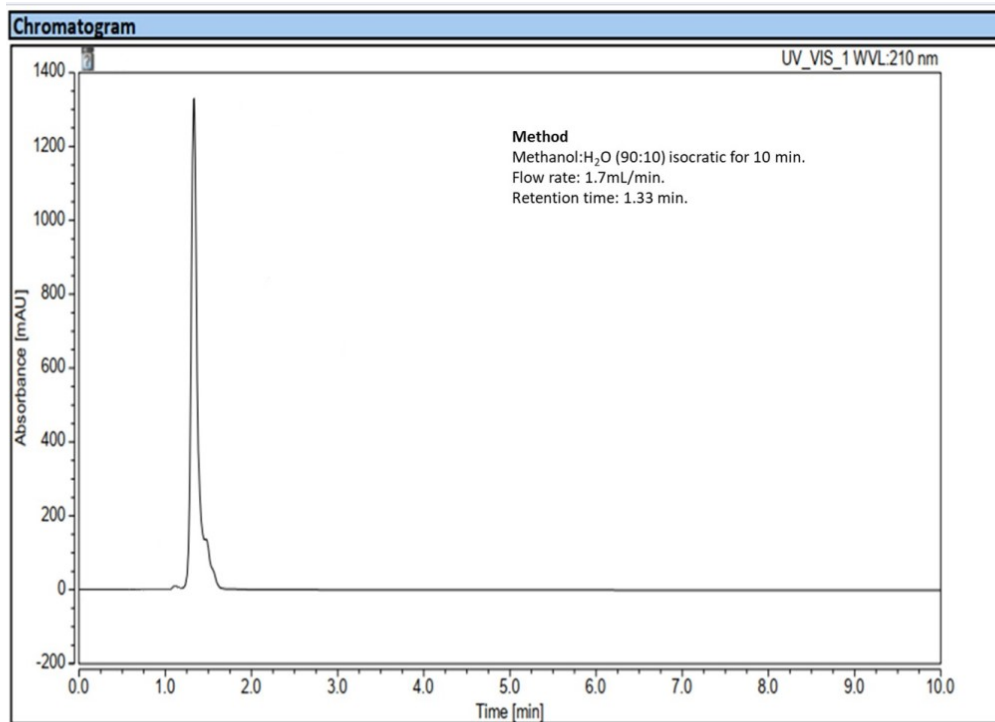

60  
61  
62

Figure S2. Impurity chart for compound 2

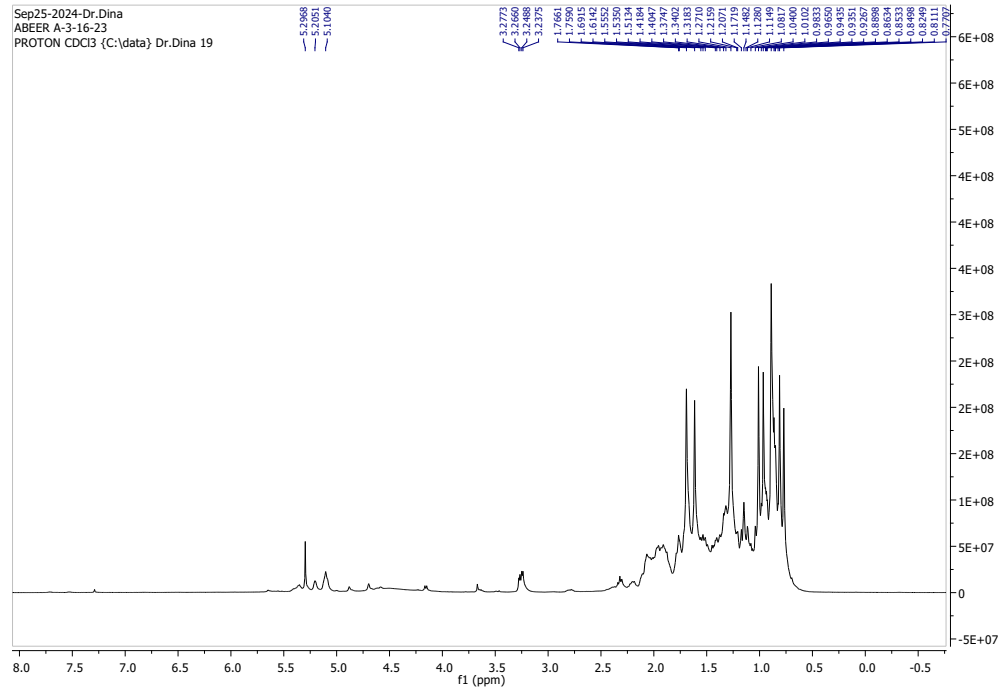

Figure S3. <sup>1</sup>H NMR spectrum of compound **1** measured in CDCl<sub>3</sub> at 400 MHz.

63  
 64  
 65

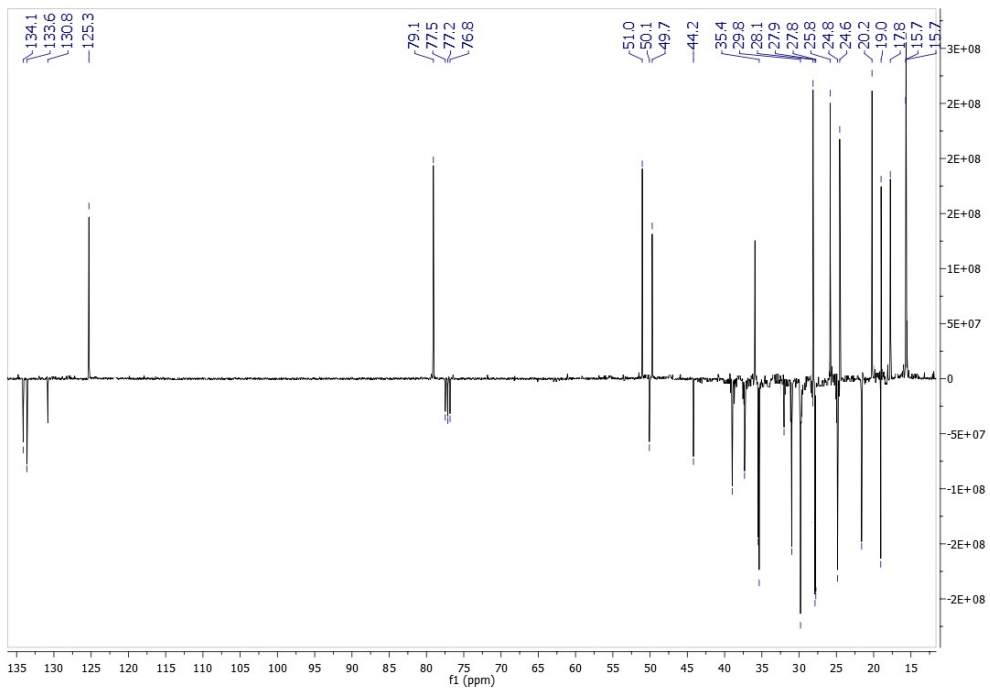

Figure S4. DEPT-Q NMR spectrum of compound **1** measured in CDCl<sub>3</sub> at 400 MHz.

66  
 67



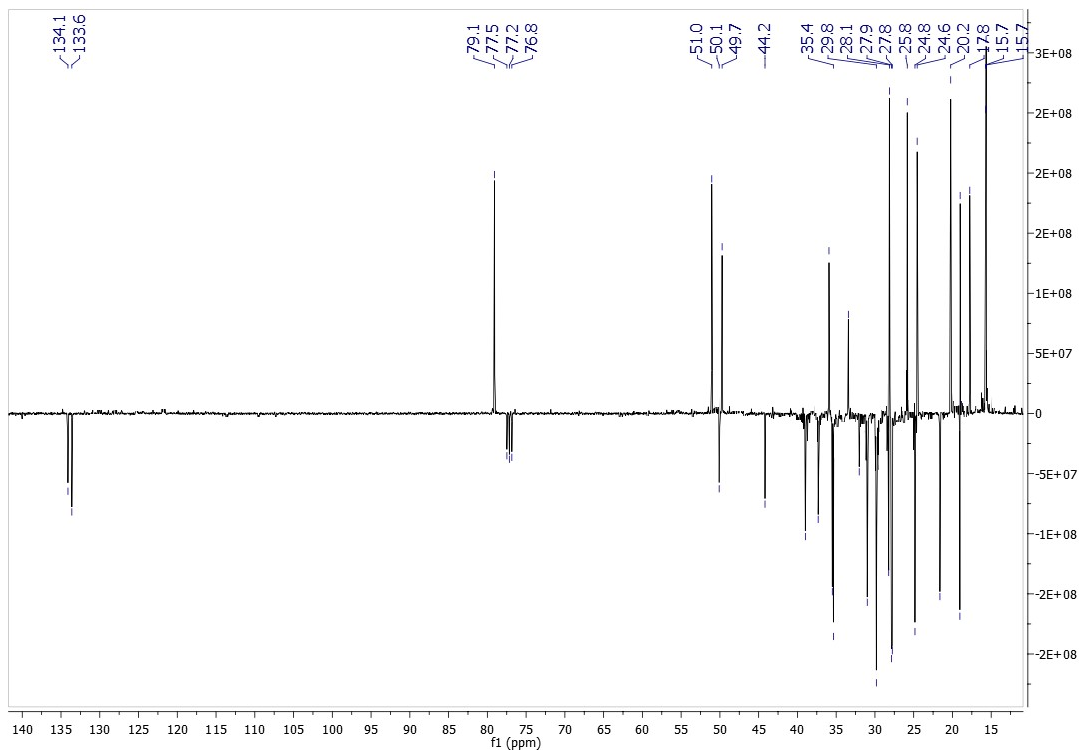

78  
79

**Figure S6.** DEPT-Q NMR spectrum of compound **2** measured in CDCl<sub>3</sub> at 400 MHz.

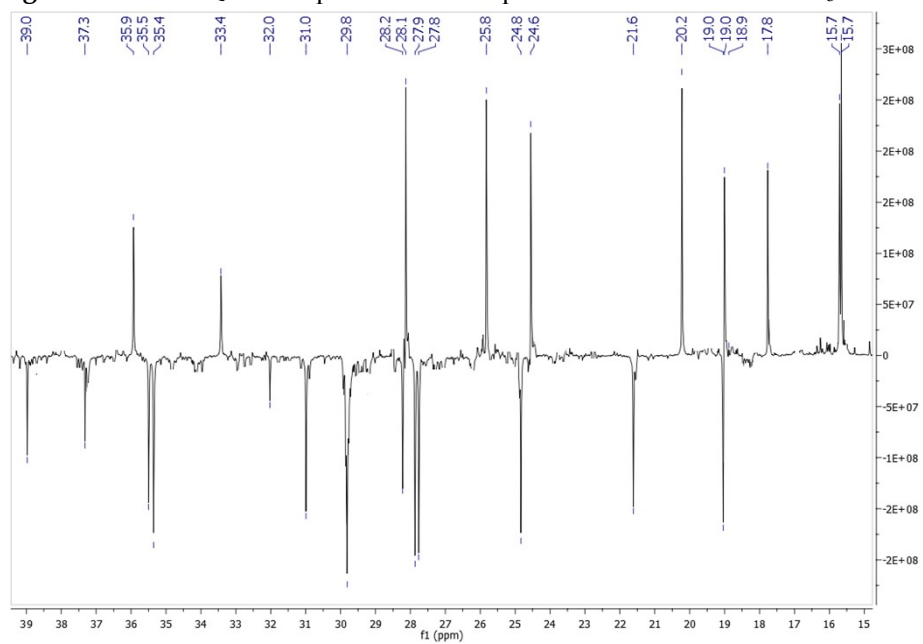

80  
81  
82  
83

**Figure S6 Cont.** DEPT-Q NMR spectrum of compound **2** measured in CDCl<sub>3</sub> at 400 MHz.

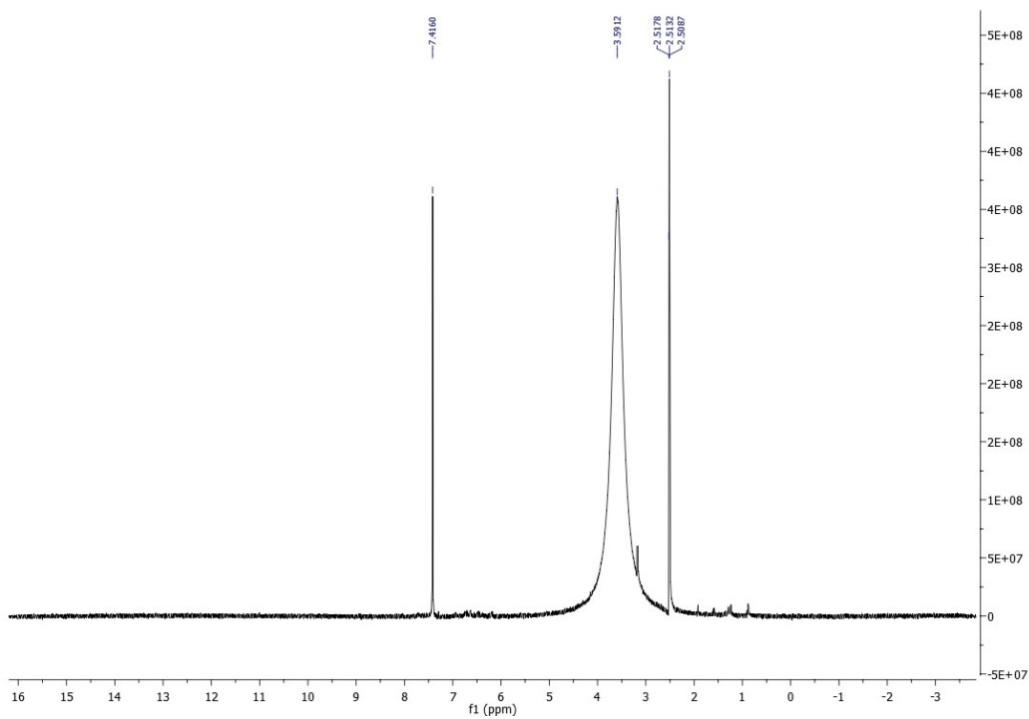

84  
85

Figure S7. 1H NMR spectrum of compound 3 measured in DMSO at 400 MHz

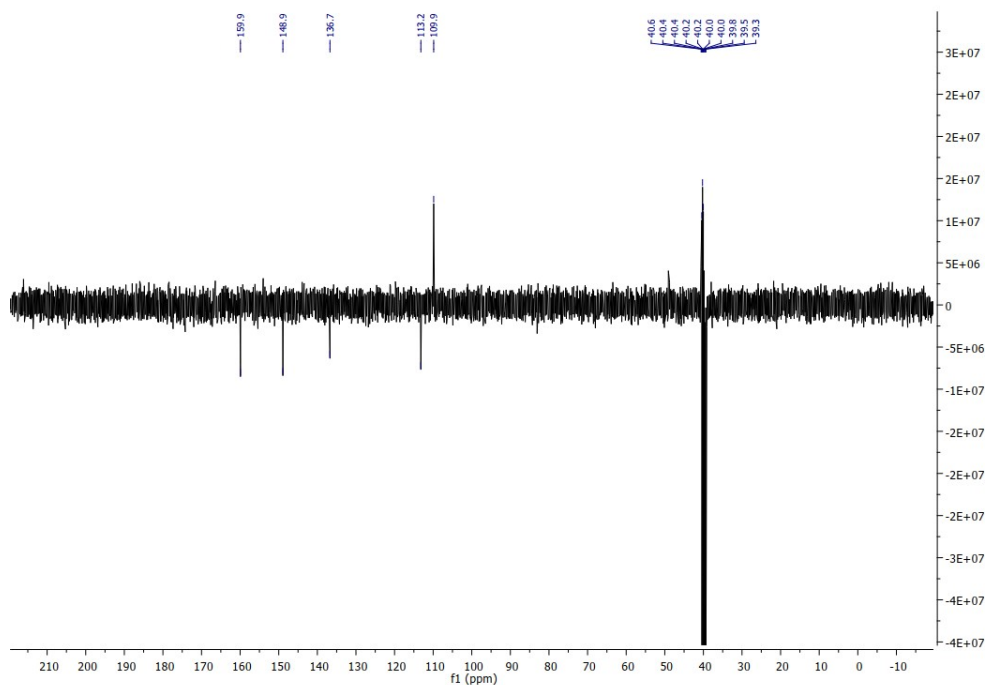

86  
87  
88  
89

Figure S8. DEPT-Q NMR spectrum of compound 3 measured in DMSO at 100 MHz

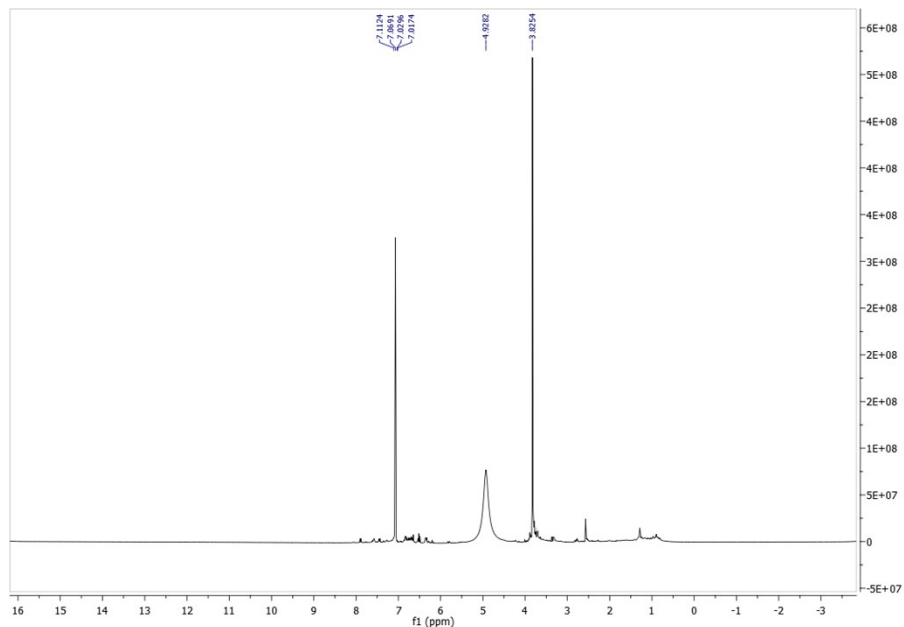

90  
91  
92

Figure S9. <sup>1</sup>H NMR spectrum of compound 4 measured in CD<sub>3</sub>OD at 400 MHz.

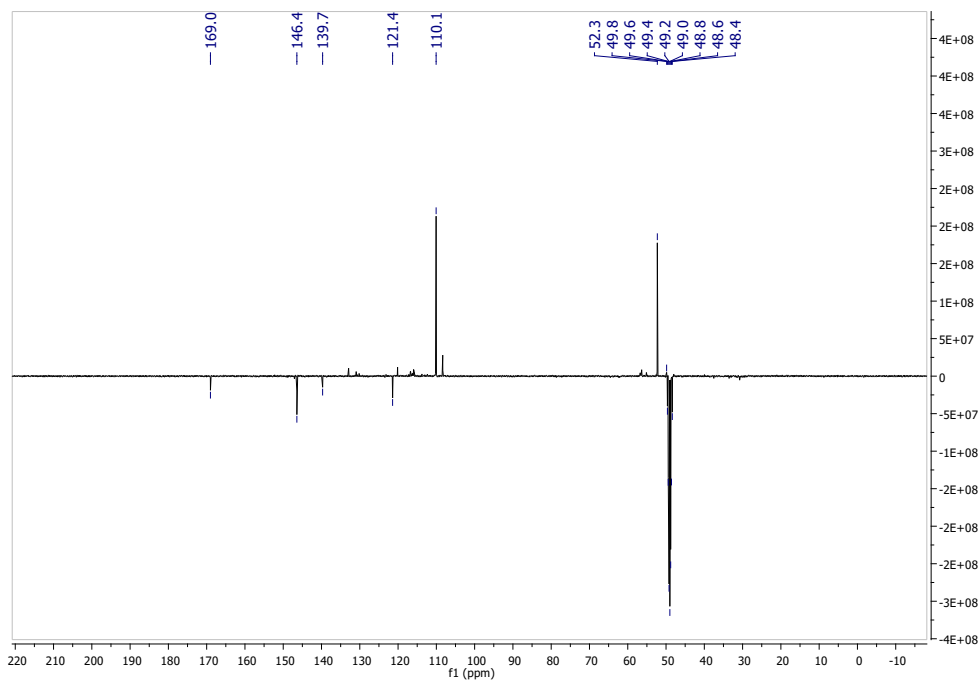

93  
94  
95  
96

Figure S10. DEPT-Q NMR spectrum of compound 4 measured in CD<sub>3</sub>OD at 100 MHz.

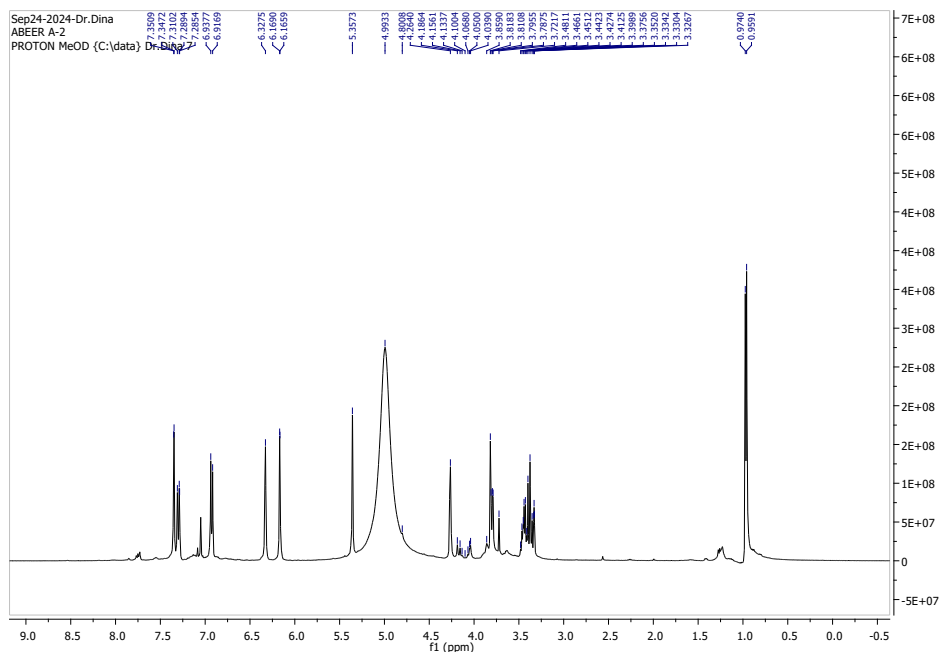

Figure S11.  $^1\text{H}$  NMR spectrum of compound **5** measured in  $\text{CD}_3\text{OD}$  at 400 MHz.

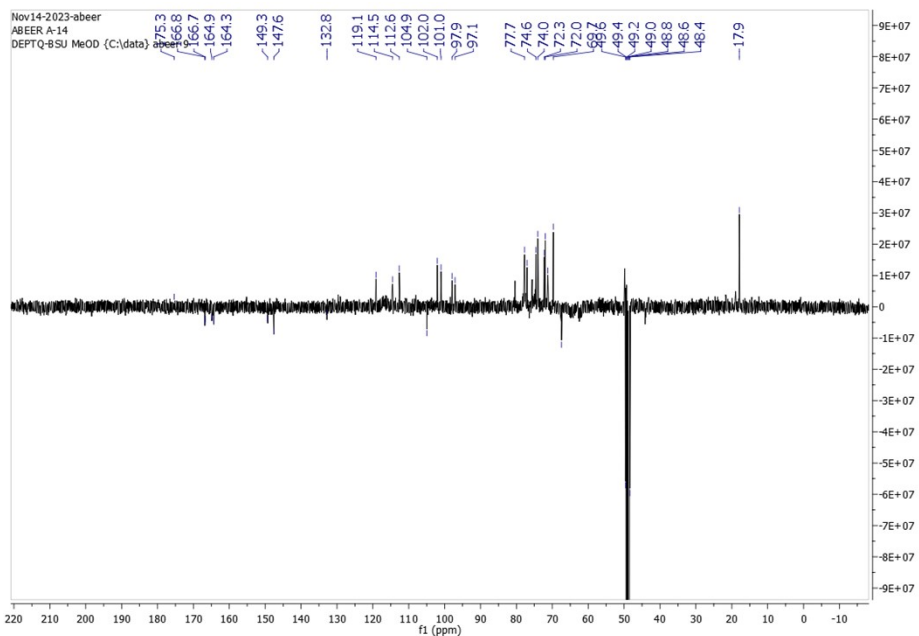

Figure S12. DEPT-Q NMR spectrum of compound **5** measured in  $\text{CD}_3\text{OD}$  at 100 MHz.

97  
98  
99

100  
101  
102  
103  
104  
105  
106  
107  
108  
109

110 **Table S1:** List of proteins related to *Klebsiella*.

| Protein                                                | Online library Source |
|--------------------------------------------------------|-----------------------|
| Toll Like Receptor 4                                   | NCBI<br>(PubMed/PMC)  |
| CD14 Molecule                                          | NCBI<br>(PubMed/PMC)  |
| Lymphocyte Antigen 96 (MD-2)                           | NCBI<br>(PubMed/PMC)  |
| Toll Like Receptor 2                                   | NCBI<br>(PubMed/PMC)  |
| Nucleotide Binding Oligomerization Domain Containing 1 | NCBI<br>(PubMed/PMC)  |
| Nucleotide Binding Oligomerization Domain Containing 2 | NCBI<br>(PubMed/PMC)  |
| Myeloid Differentiation Primary Response 88            | NCBI<br>(PubMed/PMC)  |
| TIR Domain Containing Adaptor Protein (TIRAP/MAL)      | NCBI<br>(PubMed/PMC)  |
| TIR Domain Containing Adaptor Molecule 1 (TRIF)        | NCBI<br>(PubMed/PMC)  |
| Interleukin 1 Receptor Associated Kinase 1             | NCBI<br>(PubMed/PMC)  |
| Interleukin 1 Receptor Associated Kinase 4             | NCBI<br>(PubMed/PMC)  |
| TNF Receptor Associated Factor 6                       | NCBI<br>(PubMed/PMC)  |
| NLR Family Pyrin Domain Containing 3                   | NCBI<br>(PubMed/PMC)  |
| PYD And CARD Domain Containing (ASC)                   | NCBI<br>(PubMed/PMC)  |
| Caspase 1                                              | NCBI<br>(PubMed/PMC)  |
| Interleukin 23 Subunit Alpha                           | NCBI<br>(PubMed/PMC)  |
| Interleukin 17A                                        | NCBI<br>(PubMed/PMC)  |
| Interleukin 17F                                        | NCBI<br>(PubMed/PMC)  |
| C-X-C Motif Chemokine Ligand 1                         | NCBI<br>(PubMed/PMC)  |
| C-X-C Motif Chemokine Ligand 2                         | NCBI<br>(PubMed/PMC)  |
| C-X-C Motif Chemokine Ligand 5                         | NCBI<br>(PubMed/PMC)  |
| C-X-C Motif Chemokine Receptor 1                       | NCBI<br>(PubMed/PMC)  |
| C-X-C Motif Chemokine Receptor 2                       | NCBI                  |

|                                                        |                      |
|--------------------------------------------------------|----------------------|
|                                                        | (PubMed/PMC)         |
| Colony Stimulating Factor 3 (G-CSF)                    | NCBI<br>(PubMed/PMC) |
| Complement C3                                          | NCBI<br>(PubMed/PMC) |
| Complement C5                                          | NCBI<br>(PubMed/PMC) |
| Complement C5a Receptor 1                              | NCBI<br>(PubMed/PMC) |
| Nitric Oxide Synthase 2                                | NCBI<br>(PubMed/PMC) |
| Cytochrome B-245 Beta Chain (NOX2/gp91phox)            | NCBI<br>(PubMed/PMC) |
| Myeloperoxidase                                        | NCBI<br>(PubMed/PMC) |
| Toll Like Receptor 4                                   | NCBI<br>(PubMed/PMC) |
| CD14 Molecule                                          | NCBI<br>(PubMed/PMC) |
| Lymphocyte Antigen 96 (MD-2)                           | NCBI<br>(PubMed/PMC) |
| Toll Like Receptor 2                                   | NCBI<br>(PubMed/PMC) |
| Nucleotide Binding Oligomerization Domain Containing 1 | NCBI<br>(PubMed/PMC) |
| Nucleotide Binding Oligomerization Domain Containing 2 | NCBI<br>(PubMed/PMC) |
| Myeloid Differentiation Primary Response 88            | NCBI<br>(PubMed/PMC) |
| TIR Domain Containing Adaptor Protein (TIRAP/MAL)      | NCBI<br>(PubMed/PMC) |
| TIR Domain Containing Adaptor Molecule 1 (TRIF)        | NCBI<br>(PubMed/PMC) |
| Interleukin 1 Receptor Associated Kinase 1             | NCBI<br>(PubMed/PMC) |
| Interleukin 1 Receptor Associated Kinase 4             | NCBI<br>(PubMed/PMC) |
| TNF Receptor Associated Factor 6                       | NCBI<br>(PubMed/PMC) |
| NLR Family Pyrin Domain Containing 3                   | NCBI<br>(PubMed/PMC) |
| PYD And CARD Domain Containing (ASC)                   | NCBI<br>(PubMed/PMC) |
| Caspase 1                                              | NCBI<br>(PubMed/PMC) |
| Interleukin 23 Subunit Alpha                           | NCBI<br>(PubMed/PMC) |
| Interleukin 17A                                        | NCBI                 |

|                                     |              |
|-------------------------------------|--------------|
|                                     | (PubMed/PMC) |
| Interleukin 17F                     | NCBI         |
|                                     | (PubMed/PMC) |
| C-X-C Motif Chemokine Ligand 1      | NCBI         |
|                                     | (PubMed/PMC) |
| C-X-C Motif Chemokine Ligand 2      | NCBI         |
|                                     | (PubMed/PMC) |
| C-X-C Motif Chemokine Ligand 5      | NCBI         |
|                                     | (PubMed/PMC) |
| C-X-C Motif Chemokine Receptor 1    | NCBI         |
|                                     | (PubMed/PMC) |
| C-X-C Motif Chemokine Receptor 2    | NCBI         |
|                                     | (PubMed/PMC) |
| Colony Stimulating Factor 3 (G-CSF) | NCBI         |
|                                     | (PubMed/PMC) |

111  
112  
113  
114  
115

**Table S2:** GO enrichment entry.

| category  | description                                           |
|-----------|-------------------------------------------------------|
| GO:000960 |                                                       |
| 7         | Negative regulation of inflammatory response          |
| GO:000695 |                                                       |
| 2         | Negative regulation of endothelial cell proliferation |
| GO:000695 |                                                       |
| 5         | Positive regulation of protein transport              |
| GO:005170 |                                                       |
| 7         | Regulation of epithelial cell differentiation         |
| GO:000237 |                                                       |
| 6         | Regulation of cellular localization                   |
| GO:004441 |                                                       |
| 9         | Positive regulation of cellular component biogenesis  |
| GO:003409 |                                                       |
| 7         | Negative regulation of interleukin-17 production      |
| GO:007134 |                                                       |
| 5         | Positive regulation of heterotypic cell-cell adhesion |
| GO:000695 |                                                       |
| 4         | Negative regulation by host of viral transcription    |
| GO:000181 |                                                       |
| 9         | Positive regulation of neuron death                   |
| GO:009854 |                                                       |
| 2         | Immunoglobulin mediated immune response               |
| GO:000223 |                                                       |
| 7         | Regulation of proteolysis                             |
| GO:001922 |                                                       |
| 1         | T cell chemotaxis                                     |

GO:000961  
 7 Cellular homeostasis  
 GO:007131  
 0 Negative regulation of interleukin-6 production  
 GO:000181  
 7 Regulation of cellular respiration  
 GO:007088  
 7 Regulation of endopeptidase activity  
 GO:007121  
 9 Positive regulation of miRNA transcription  
 GO:000960  
 5 Regulation of establishment of endothelial barrier  
 GO:001003  
 3 Negative regulation of miRNA maturation  
 GO:000268  
 2 Regulation of steroid metabolic process  
 GO:003249  
 6 Regulation of T cell chemotaxis  
 GO:007122  
 2 Regulation of lipid storage  
 GO:000695  
 0 Positive regulation of membrane protein ectodomain proteolysis  
 GO:001062  
 8 Cellular response to peptide hormone stimulus  
 GO:000268  
 4 Tissue remodeling  
 GO:004508  
 7 Positive regulation of cellular extravasation  
 GO:190170  
 1 Positive regulation of macrophage derived foam cell differentiation  
 GO:003210  
 3 Negative regulation of angiogenesis  
 GO:000716  
 5 Negative regulation of myeloid cell apoptotic process  
 GO:004222  
 1 Positive regulation of glial cell proliferation  
 GO:003210  
 1 Regulation of lipid localization  
 GO:190170  
 0 Positive regulation of immunoglobulin production  
 GO:005077  
 6 Regulation of platelet activation  
 GO:005124  
 0 Peptidyl-amino acid modification  
 GO:004858  
 4 Regulation of tumor necrosis factor-mediated signaling pathway  
 GO:003399  
 3 Positive regulation of cellular amide metabolic process

GO:000716  
 6 Regulation of lipid biosynthetic process  
 GO:007139  
 6 Negative regulation of interleukin-8 production  
 GO:005171  
 6 Toll-like receptor 8 signaling pathway  
 GO:003134  
 9 Toll-like receptor TLR6:TLR2 signaling pathway  
 GO:000222  
 1 Detection of diacyl bacterial lipopeptide  
 GO:003134  
 7 Positive regulation of type I interferon-mediated signaling pathway  
 GO:005123  
 9 Positive regulation of vitamin D biosynthetic process  
 GO:000961  
 5 Cellular response to exogenous dsRNA  
 GO:001064  
 7 Positive regulation of cellular response to macrophage colony-stimulating factor stimulus  
 GO:002305  
 6 Response to gold nanoparticle  
 GO:001060  
 4 Regulation of lipid metabolic process  
 GO:000996  
 7 Biological process involved in interaction with symbiont  
 GO:000989  
 3 Biological process involved in symbiotic interaction  
 GO:190355  
 7 Leukocyte tethering or rolling  
 GO:003555  
 6 3-UTR-mediated mRNA stabilization  
 GO:003276  
 0 Regulation of bicellular tight junction assembly  
 GO:000996  
 6 Myeloid leukocyte mediated immunity  
 GO:003267  
 7 Nitric oxide biosynthetic process  
 GO:005077  
 8 Positive regulation of peptidyl-serine phosphorylation of STAT protein  
 GO:004858  
 3 Positive regulation of amyloid-beta formation  
 GO:000222  
 4 Negative regulation of immune response  
 GO:190355  
 5 Stimulatory C-type lectin receptor signaling pathway  
 GO:003275  
 5 Response to metal ion  
 GO:004851  
 8 Positive regulation of steroid biosynthetic process

GO:001064  
 6 Regulation of epithelial cell proliferation  
 GO:000276  
 4 Fever generation  
 GO:002305  
 1 Chronic inflammatory response to antigenic stimulus  
 GO:190253  
 3 Regulation of chronic inflammatory response to antigenic stimulus  
 GO:004852  
 2 Negative regulation of interleukin-18 production  
 GO:003268  
 0 Cellular response to interferon-beta  
 GO:005109  
 1 Fc-epsilon receptor signaling pathway  
 GO:003275  
 7 Cellular response to triacyl bacterial lipopeptide  
 GO:003267  
 5 Positive regulation of monocyte chemotaxis  
 GO:008013  
 4 Positive regulation of matrix metalloproteinase secretion  
 GO:005109  
 2 Negative regulation of primary miRNA processing  
 GO:000269  
 9 Response to hypoxia  
 GO:005072  
 7 Peptidyl-serine phosphorylation  
 GO:004312  
 2 Positive regulation of cell killing  
 GO:000269  
 7 Positive regulation of nucleocytoplasmic transport  
 GO:000724  
 9 Positive regulation of miRNA-mediated gene silencing  
 GO:004312  
 3 Negative regulation of immune effector process  
 GO:003166  
 3 Natural killer cell activation  
 GO:000177  
 5 Positive regulation of gliogenesis  
 GO:190253  
 1 Myeloid dendritic cell activation  
 GO:003265  
 5 Neutrophil mediated immunity  
 GO:000828  
 4 Positive regulation of muscle cell apoptotic process  
 GO:005109  
 0 Regulation of muscle cell apoptotic process  
 GO:000270  
 0 Positive regulation of cytosolic calcium ion concentration

GO:005086  
 7 Natural killer cell activation involved in immune response  
 GO:007066  
 5 Response to muscle stretch  
 GO:003272  
 2 B cell differentiation  
 GO:001046  
 8 Positive regulation of reactive oxygen species metabolic process  
 GO:003264  
 2 Positive regulation of apoptotic signaling pathway  
 GO:000271  
 8 Sequestering of triglyceride  
 GO:007134  
 7 Detection of lipopolysaccharide  
 GO:000269  
 6 Granulocyte-macrophage colony-stimulating factor signaling pathway  
 GO:003247  
 9 MDA-5 signaling pathway  
 GO:003132  
 5 Regulation of generation of precursor metabolites and energy  
 GO:004274  
 2 Regulation of steroid biosynthetic process  
 GO:000989  
 1 Pyroptosis  
 GO:000268  
 5 Regulation of Golgi inheritance  
 GO:004532  
 1 Negative regulation of bicellular tight junction assembly  
 GO:000270  
 2 Positive regulation of T-helper 17 cell lineage commitment  
 GO:005117  
 3 Negative regulation of nitrogen compound metabolic process  
 GO:009858  
 6 Killing of cells of another organism  
 GO:004212  
 7 Neurogenesis  
 GO:004409  
 3 Positive regulation of calcium ion transport  
 GO:005072  
 9 Negative regulation of myoblast differentiation  
 GO:003132  
 8 Response to fungus  
 GO:005090  
 0 Regulation of glucose transmembrane transport  
 GO:005160  
 7 Macrophage differentiation  
 GO:000016  
 5 Regulation of tissue remodeling

GO:003273  
 5 Negative regulation of intracellular signal transduction  
 GO:003273  
 1 Liver regeneration  
 GO:000283  
 1 Response to angiotensin  
 GO:007066  
 3 Membrane to membrane docking  
 GO:003248  
 1 Positive regulation of histone phosphorylation  
 GO:003461  
 2 Negative regulation of myosin-light-chain-phosphatase activity  
 GO:000270  
 3 Regulation of myoblast differentiation  
 GO:190122  
 4 Positive regulation of complement activation  
 GO:005125  
 1 Intestinal epithelial structure maintenance  
 GO:007135  
 6 Caveolin-mediated endocytosis  
 GO:004594  
 4 Positive regulation of macrophage proliferation  
 GO:005067  
 1 Negative regulation of macrophage apoptotic process  
 GO:003264  
 9 Temperature homeostasis  
 GO:000227  
 4 Regulation of cyclase activity  
 GO:000268  
 7 Response to sterol  
 GO:005140  
 3 Positive regulation of erythrocyte differentiation  
 GO:003272  
 9 Chemical homeostasis  
 GO:005086  
 5 Regulation of reactive oxygen species metabolic process  
 GO:190122  
 2 Gland development  
 GO:000281  
 9 Response to xenobiotic stimulus  
 GO:000269  
 4 Immune response-regulating cell surface receptor signaling pathway  
 GO:002240  
 9 Response to toxic substance  
 GO:004341  
 0 Negative regulation of osteoclast differentiation  
 GO:005079  
 4 Protein modification process

GO:003265  
 2 Positive regulation of immature T cell proliferation in thymus  
 GO:000275  
 5 Positive regulation of killing of cells of another organism  
 GO:000282  
 1 Cellular response to peptidoglycan  
 GO:001055  
 7 Regulation of phosphatase activity  
 GO:000283  
 3 Regulation of small molecule metabolic process  
 GO:190169  
 8 Reproductive structure development  
 GO:190303  
 7 Positive regulation of transmembrane transport  
 GO:002240  
 7 Tissue homeostasis  
 GO:190303  
 9 Regulation of leukocyte mediated cytotoxicity  
 GO:005067  
 0 Regulation of viral genome replication  
 GO:200002  
 6 Positive regulation of lipid metabolic process  
 GO:000272  
 0 Positive regulation of lipid biosynthetic process  
 GO:005124  
 9 Regulation of sensory perception of pain  
 GO:009752  
 9 Positive regulation of vascular associated smooth muscle cell proliferation  
 GO:006032  
 6 Wound healing involved in inflammatory response  
 GO:000282  
 4 Positive regulation of dendritic cell antigen processing and presentation  
 GO:001094  
 1 Positive regulation of humoral immune response mediated by circulating immunoglobulin  
 GO:000282  
 2 Positive regulation of fever generation  
 GO:003033  
 5 Negative regulation of toll-like receptor signaling pathway  
 GO:003264  
 7 Negative regulation of toll-like receptor 2 signaling pathway  
 GO:004232  
 5 Type III interferon signaling pathway  
 GO:004340  
 8 Astrocyte cell migration  
 GO:003059  
 5 Positive regulation of T-helper 2 cell differentiation  
 GO:000193  
 4 Trachea formation

GO:004593  
 5 T-helper 17 cell lineage commitment  
 GO:004589  
 3 Regulation of viral process  
 GO:000193  
 2 Inflammatory response to antigenic stimulus  
 GO:001922  
 0 Regulation of anion transport  
 GO:003434  
 1 Negative regulation of viral process  
 GO:005124  
 7 Response to corticosteroid  
 GO:000268  
 8 Inflammatory cell apoptotic process  
 GO:009753  
 0 Release of sequestered calcium ion into cytosol by sarcoplasmic reticulum  
 GO:000988  
 9 Outer ear morphogenesis  
 GO:190001  
 5 Regulation of cell adhesion molecule production  
 GO:006500  
 9 T cell extravasation  
 GO:007134  
 6 Positive regulation of apoptotic cell clearance  
 GO:003272  
 7 Regulation of interleukin-1-mediated signaling pathway  
 GO:003264  
 8 Organ or tissue specific immune response  
 GO:004593  
 7 Superoxide metabolic process  
 GO:003132  
 6 Negative regulation of RNA metabolic process  
 GO:003033  
 4 Acute-phase response  
 GO:005124  
 6 Response to heat  
 GO:005079  
 3 Cellular response to vascular endothelial growth factor stimulus  
 GO:000225  
 2 Positive regulation of protein import into nucleus  
 GO:001407  
 0 Positive regulation of calcium-mediated signaling  
 GO:199026  
 6 Toll-like receptor 3 signaling pathway  
 GO:001024  
 3 Positive regulation of memory T cell differentiation  
 GO:003139  
 9 Cellular response to muramyl dipeptide

GO:004576  
 5 Negative regulation of amyloid-beta clearance  
 GO:007049  
 8 Positive regulation of T-helper 2 cell cytokine production  
 GO:004306  
 7 Regulation of calcium ion transport  
 GO:004308  
 5 Peptidyl-tyrosine phosphorylation  
 GO:190370  
 6 Negative regulation of interferon-gamma production  
 GO:003140  
 1 Response to hydrogen peroxide  
 GO:000225  
 0 T cell receptor signaling pathway  
 GO:000961  
 2 Positive regulation of mitotic nuclear division  
 GO:000270  
 5 Regulation of binding  
 GO:000270  
 6 Leukocyte apoptotic process  
 GO:003059  
 3 Positive regulation of binding  
 GO:000725  
 4 Tube development  
 GO:190001  
 7 Postsynapse to nucleus signaling pathway  
 GO:003015  
 5 Positive regulation of glial cell migration  
 GO:007009  
 8 Negative regulation of I-kappaB kinase/NF-kappaB signaling  
 GO:004508  
 9 Negative regulation of leukocyte differentiation  
 GO:000635  
 5 Negative regulation of lipid localization  
 GO:003272  
 8 Negative regulation of epithelial cell differentiation  
 GO:004298  
 1 Cellular response to heat  
 GO:001055  
 6 Positive regulation of secretion by cell  
 GO:006033  
 7 Regulation of ion transmembrane transport  
 GO:004633  
 0 Positive regulation of dendritic cell cytokine production  
 GO:005087  
 0 Bergmann glial cell differentiation  
 GO:005083  
 0 Positive regulation of podosome assembly

GO:000269  
 0 Endothelial cell apoptotic process  
 GO:003132  
 3 Response to steroid hormone  
 GO:004559  
 5 Positive regulation of organelle organization  
 GO:005117  
 1 Positive regulation of lipid localization  
 GO:005086  
 3 Positive regulation of extrinsic apoptotic signaling pathway  
 GO:190165  
 2 Positive regulation of protein kinase B signaling  
 GO:004210  
 2 Positive regulation of toll-like receptor 4 signaling pathway  
 GO:001921  
 9 Positive regulation of smooth muscle cell apoptotic process  
 GO:003806  
 1 Type 2 immune response  
 GO:005079  
 0 Cardiac neural crest cell development involved in heart development  
 GO:000693  
 5 Positive regulation of platelet aggregation  
 GO:003287  
 2 Positive regulation of tumor necrosis factor-mediated signaling pathway  
 GO:000270  
 8 Positive regulation of miRNA maturation  
 GO:004508  
 8 Immune response-activating cell surface receptor signaling pathway  
 GO:000270  
 9 Cellular response to metal ion  
 GO:005109  
 4 Cellular cation homeostasis  
 GO:000725  
 2 Cellular chemical homeostasis  
 GO:004211  
 6 Regulation of metal ion transport  
 GO:003266  
 0 Positive regulation of cyclase activity  
 GO:003355  
 4 Negative regulation of smooth muscle cell proliferation  
 GO:000971  
 9 Regulation of hormone levels  
 GO:000246  
 0 Regulation of cell junction assembly  
 GO:001647  
 7 Heterophilic cell-cell adhesion via plasma membrane cell adhesion molecules  
 GO:190210  
 5 Osteoclast differentiation

GO:004563  
 7 Positive regulation of inflammatory response to antigenic stimulus  
 GO:000962  
 8 Tyrosine phosphorylation of STAT protein  
 GO:008009  
 0 p38MAPK cascade  
 GO:001094  
 2 Regulation of tau-protein kinase activity  
 GO:000635  
 7 Regulation of ossification  
 GO:007126  
 0 B cell activation involved in immune response  
 GO:000725  
 9 Negative regulation of viral genome replication  
 GO:004866  
 0 Positive regulation of epithelial cell proliferation  
 GO:005177  
 0 Negative regulation of type 2 immune response  
 GO:004212  
 9 Positive regulation of prostaglandin secretion  
 GO:000226  
 9 Positive regulation of monocyte chemotactic protein-1 production  
 GO:004586  
 0 Positive regulation of cellular respiration  
 GO:190169  
 9 Positive regulation of leukocyte mediated cytotoxicity  
 GO:007037  
 2 Positive regulation of DNA binding  
 GO:004866  
 1 Regulation of phosphoprotein phosphatase activity  
 GO:006190  
 0 Negative regulation of cellular metabolic process  
 GO:000272  
 4 Positive regulation of calcium ion import  
 GO:006075  
 9 Reactive oxygen species biosynthetic process  
 GO:005134  
 7 Regulation of neuron apoptotic process  
 GO:003273  
 3 Negative regulation of transport  
 GO:004576  
 6 Regulation of myeloid leukocyte mediated immunity  
 GO:007037  
 4 Negative regulation of tumor necrosis factor production  
 GO:004253  
 1 Liver development  
 GO:006090  
 7 Positive regulation of protein secretion

GO:004563  
 9 Complement activation, alternative pathway  
 GO:004851  
 9 Positive regulation of T cell chemotaxis  
 GO:000181  
 8 Myeloid cell apoptotic process  
 GO:190262  
 2 Cellular response to hepatocyte growth factor stimulus  
 GO:003274  
 0 Response to radiation  
 GO:000236  
 6 Response to wounding  
 GO:000646  
 8 Regulation of fat cell differentiation  
 GO:007162  
 2 Positive regulation of synaptic transmission  
 GO:000177  
 4 Regulation of lymphocyte apoptotic process  
 GO:004585  
 9 Endocytosis  
 GO:005124  
 1 Response to UV-B  
 GO:007140  
 7 Positive regulation of telomere capping  
 GO:000691  
 5 Positive regulation of neurogenesis  
 GO:007167  
 4 Cellular response to hydrogen peroxide  
 GO:004306  
 8 Negative regulation of glucose transmembrane transport  
 GO:000271  
 1 Ectopic germ cell programmed cell death  
 GO:003320  
 9 Positive regulation of reactive oxygen species biosynthetic process  
 GO:004333  
 1 Regulation of microglial cell activation  
 GO:000276  
 1 Regulation of early endosome to late endosome transport  
 GO:004542  
 8 Regulation of intracellular transport  
 GO:000695  
 9 Negative regulation of leukocyte mediated immunity  
 GO:007167  
 5 Response to activity  
 GO:005133  
 8 Response to ionizing radiation  
 GO:005082  
 9 Response to glucocorticoid

GO:007141  
 7 Macrophage activation involved in immune response  
 GO:004542  
 9 Positive regulation of lymphocyte apoptotic process  
 GO:004567  
 0 Positive regulation of endothelial cell apoptotic process  
 GO:004306  
 5 Regulation of nervous system process  
 GO:006220  
 7 Receptor internalization  
 GO:190165  
 3 Regulation of cold-induced thermogenesis  
 GO:004642  
 7 Nervous system development  
 GO:007122  
 3 Positive regulation of small molecule metabolic process  
 GO:005073  
 1 Negative regulation of nervous system development  
 GO:003412  
 1 Negative regulation of cellular catabolic process  
 GO:001631  
 0 Negative regulation of leukocyte chemotaxis  
 GO:000272  
 6 Negative regulation of nervous system process  
 GO:000195  
 9 Positive regulation of sprouting angiogenesis  
 GO:000275  
 6 Protein metabolic process  
 GO:004853  
 4 Regulation of behavior  
 GO:000275  
 3 Placenta development  
 GO:003141  
 0 Cytoplasmic vesicle  
 GO:003198  
 2 Vesicle  
 GO:003122  
 6 Intrinsic component of plasma membrane  
 GO:004323  
 5 Receptor complex  
 GO:000576  
 8 Endosome  
 GO:000989  
 7 External side of plasma membrane  
 GO:009855  
 2 Side of membrane  
 GO:009880  
 2 Plasma membrane signaling receptor complex

GO:000557  
 6 Extracellular region  
 GO:001250  
 6 Vesicle membrane  
 GO:000588  
 6 Plasma membrane  
 GO:000588  
 7 Integral component of plasma membrane  
 GO:000998  
 6 Cell surface  
 GO:000561  
 5 Extracellular space  
 GO:003065  
 9 Cytoplasmic vesicle membrane  
 GO:009879  
 7 Plasma membrane protein complex  
 GO:001000  
 8 Endosome membrane  
 GO:007253  
 6 interleukin-23 receptor complex  
 GO:001250  
 5 Endomembrane system  
 GO:004533  
 5 Phagocytic vesicle  
 GO:003563  
 1 CD40 receptor complex  
 GO:009879  
 6 Membrane protein complex  
 GO:004512  
 1 Membrane raft  
 GO:003013  
 9 Endocytic vesicle  
 GO:003602  
 0 Endolysosome membrane  
 GO:003014  
 1 Secretory granule  
 GO:004669  
 6 Lipopolysaccharide receptor complex  
 GO:009858  
 8 Bounding membrane of organelle  
 GO:000838  
 5 IkappaB kinase complex  
 GO:004202  
 2 interleukin-12 receptor complex  
 GO:007255  
 9 NLRP3 inflammasome complex  
 GO:000577  
 3 Vacuole

GO:000576  
 4 Lysosome  
 GO:003535  
 5 Toll-like receptor 2-Toll-like receptor 6 protein complex  
 GO:003552  
 5 NF-kappaB p50/p65 complex  
 GO:007074  
 3 interleukin-23 complex  
 GO:000582  
 9 Cytosol  
 GO:003052  
 6 Granulocyte macrophage colony-stimulating factor receptor complex  
 GO:007255  
 8 NLRP1 inflammasome complex  
 GO:009716  
 9 AIM2 inflammasome complex  
 GO:003066  
 7 Secretory granule membrane  
 GO:003477  
 4 Secretory granule lumen  
 GO:001602  
 0 Membrane  
 GO:009734  
 2 Ripoptosome  
 GO:003557  
 8 Azurophil granule lumen  
 GO:003299  
 1 Protein-containing complex  
 GO:000577  
 5 Vacuolar lumen  
 GO:190255  
 4 Serine/threonine protein kinase complex  
 GO:000512  
 6 Cytokine receptor binding  
 GO:000510  
 2 Signaling receptor binding  
 GO:000512  
 5 Cytokine activity  
 GO:000551  
 5 Protein binding  
 GO:004280  
 2 Identical protein binding  
 GO:004237  
 9 Chemokine receptor binding  
 GO:007085  
 1 Growth factor receptor binding  
 GO:000548  
 8 Binding

GO:003818  
 7 Pattern recognition receptor activity  
 GO:000800  
 9 Chemokine activity  
 GO:000166  
 4 G protein-coupled receptor binding  
 GO:009877  
 2 Molecular function regulator activity  
 GO:000514  
 9 interleukin-1 receptor binding  
 GO:003173  
 0 CCR5 chemokine receptor binding  
 GO:004802  
 0 CCR chemokine receptor binding  
 GO:000467  
 2 Protein kinase activity  
 GO:003802  
 3 Signaling receptor activity  
 GO:003532  
 5 Toll-like receptor binding  
 GO:004698  
 3 Protein dimerization activity  
 GO:004523  
 6 CXCR chemokine receptor binding  
 GO:001989  
 9 Enzyme binding  
 GO:001995  
 5 Cytokine binding  
 GO:014037  
 5 Immune receptor activity  
 GO:000489  
 6 Cytokine receptor activity  
 GO:004280  
 3 Protein homodimerization activity  
 GO:000153  
 0 Lipopolysaccharide binding  
 GO:001990  
 0 Kinase binding  
 GO:000470  
 7 MAP kinase activity  
 GO:001990  
 1 Protein kinase binding  
 GO:004283  
 4 Peptidoglycan binding  
 GO:005013  
 5 NAD(P)+ nucleosidase activity  
 GO:006180  
 9 NAD+ nucleotidase, cyclic ADP-ribose generating

GO:000467  
 4 Protein serine/threonine kinase activity  
 GO:003281  
 3 Tumor necrosis factor receptor superfamily binding  
 GO:000187  
 5 Lipopolysaccharide immune receptor activity  
 GO:009736  
 7 Carbohydrate derivative binding  
 GO:000488  
 8 Transmembrane signaling receptor activity  
 GO:001649  
 3 C-C chemokine receptor activity  
 GO:001995  
 7 C-C chemokine binding  
 GO:003172  
 6 CCR1 chemokine receptor binding  
 GO:000553  
 9 Glycosaminoglycan binding  
 GO:007172  
 3 Lipopeptide binding  
 GO:001990  
 2 Phosphatase binding  
 GO:010631  
 0 Protein serine kinase activity  
 GO:000513  
 1 Growth hormone receptor binding  
 GO:004698  
 2 Protein heterodimerization activity  
 GO:000122  
 3 Transcription coactivator binding  
 GO:005070  
 0 CARD domain binding  
 GO:000470  
 8 MAP kinase kinase activity  
 GO:000865  
 6 Cysteine-type endopeptidase activator activity involved in apoptotic process  
 GO:000491  
 8 interleukin-8 receptor activity  
 GO:000514  
 3 interleukin-12 receptor binding  
 GO:000838  
 4 I kappa B kinase activity  
 GO:001995  
 9 interleukin-8 binding  
 GO:003566  
 3 Toll-like receptor 2 binding  
 GO:000184  
 7 Opsonin receptor activity

|           |   |                                              |
|-----------|---|----------------------------------------------|
| GO:003566 | 2 | Toll-like receptor 4 binding                 |
| GO:000513 | 8 | interleukin-6 receptor binding               |
| GO:000516 | 4 | Tumor necrosis factor receptor binding       |
| GO:000552 | 4 | ATP binding                                  |
| GO:001990 | 3 | Protein phosphatase binding                  |
| GO:003170 | 2 | Type 1 angiotensin receptor binding          |
| GO:003172 | 7 | CCR2 chemokine receptor binding              |
| GO:004827 | 3 | Mitogen-activated protein kinase p38 binding |
| GO:004205 | 6 | Chemoattractant activity                     |
| GO:000808 | 3 | Growth factor activity                       |
| GO:001990 | 4 | Protein domain specific binding              |
| GO:004316 | 8 | Anion binding                                |

116  
117  
118  
119  
120

Table S3: KEGG enrichment entry.

| category | description                                     |
|----------|-------------------------------------------------|
| hsa05164 | Influenza A                                     |
| hsa05162 | Measles                                         |
| hsa04620 | Toll-like receptor signaling pathway            |
| hsa05160 | Hepatitis C                                     |
| hsa04623 | Cytosolic DNA-sensing pathway                   |
| hsa05161 | Hepatitis B                                     |
| hsa04621 | NOD-like receptor signaling pathway             |
| hsa05168 | Herpes simplex virus 1 infection                |
| hsa04060 | Cytokine-cytokine receptor interaction          |
| hsa05169 | Epstein-Barr virus infection                    |
| hsa05152 | Tuberculosis                                    |
| hsa04622 | RIG-I-like receptor signaling pathway           |
| hsa05142 | Chagas disease                                  |
| hsa05144 | Malaria                                         |
| hsa05321 | Inflammatory bowel disease                      |
| hsa05167 | Kaposi sarcoma-associated herpesvirus infection |

hsa04217 Necroptosis  
hsa04630 JAK-STAT signaling pathway  
hsa05135 Yersinia infection  
hsa05323 Rheumatoid arthritis  
hsa04625 C-type lectin receptor signaling pathway  
hsa05143 African trypanosomiasis  
hsa05163 Human cytomegalovirus infection  
hsa04380 Osteoclast differentiation  
hsa05165 Human papillomavirus infection  
hsa05170 Human immunodeficiency virus 1 infection  
Viral protein interaction with cytokine and cytokine  
hsa04061 receptor  
hsa04668 TNF signaling pathway  
hsa04657 IL-17 signaling pathway  
hsa04659 Th17 cell differentiation  
hsa05146 Amoebiasis  
hsa05140 Leishmaniasis  
hsa04062 Chemokine signaling pathway  
hsa05332 Graft-versus-host disease  
hsa05132 Salmonella infection  
hsa04933 AGE-RAGE signaling pathway in diabetic complications  
hsa05145 Toxoplasmosis  
hsa05134 Legionellosis  
hsa04650 Natural killer cell mediated cytotoxicity  
hsa05133 Pertussis  
hsa05131 Shigellosis  
hsa04940 Type I diabetes mellitus  
hsa05235 PD-L1 expression and PD-1 checkpoint pathway in cancer  
hsa05200 Pathways in cancer  
hsa04151 PI3K-Akt signaling pathway  
hsa04144 Endocytosis  
hsa01523 Antifolate resistance  
hsa04658 Th1 and Th2 cell differentiation  
hsa04640 Hematopoietic cell lineage  
hsa05330 Allograft rejection  
hsa04660 T cell receptor signaling pathway  
hsa05130 Pathogenic Escherichia coli infection  
hsa04672 Intestinal immune network for IgA production  
hsa05166 Human T-cell leukemia virus 1 infection  
hsa05320 Autoimmune thyroid disease  
hsa05418 Fluid shear stress and atherosclerosis  
hsa04612 Antigen processing and presentation  
hsa04932 Non-alcoholic fatty liver disease  
hsa05410 Hypertrophic cardiomyopathy

hsa04350 TGF-beta signaling pathway  
hsa05205 Proteoglycans in cancer  
hsa04064 NF-kappa B signaling pathway  
hsa04962 Vasopressin-regulated water reabsorption  
hsa05020 Prion disease  
hsa04145 Phagosome

121  
122  
123  
124  
125  
126  
127  
128  
129

**Table S4.** Binding energies (kcal/mol) and RMSD (Å) of *E. tirucalli* compounds docked into the active-site pocket of *Klebsiella pneumoniae* LpxH (PDB ID: 8QK2).

| <b>NO</b> | <b>Compound</b> | <b>S<br/>kcal/mol</b> | <b>RMSD_Refine</b> |
|-----------|-----------------|-----------------------|--------------------|
| 1         | Euphol          | -8.13                 | 1.02               |
| 2         | Euph-8-enol     | -6.16                 | 1.61               |
| 3         | Gallic acid     | -6.37                 | 1.57               |
| 4         | Methyl gallate  | -6.12                 | 1.69               |
| 5         | Rutin           | -7.04                 | 1.63               |

130
